# Supplementary material for: Choosing the best molecular precursor to prepare Li4Ti5O12 by the sol–gel method using 1H NMR: evidence of [Ti3(OEt)13]− in solution
Source: Royal Society of Chemistry journal article supplement (doi:10.1039/c6dt01949h), 2016-01-01
Supplement: c6dt01949h1.pdf [file c6dt01949h1.pdf]

## Supporting Information

### Choosing the best molecular precursor to prepare $\text{Li}_4\text{Ti}_5\text{O}_{12}$ by the sol-gel method using $^1\text{H}$ NMR. Evidences of $[\text{Ti}_3(\text{OEt})_{13}]^-$ in solution.

Authors: Gabriel García-Herbosa <sup>a</sup>, Mario Aparicio <sup>b</sup>, Jadra Mosa <sup>b</sup>, José V. Cuevas <sup>a</sup>, Tomás Torroba <sup>a</sup>.

<sup>a</sup> Departamento de Química, Universidad de Burgos, Plaza Misael Bañuelos s/n, Burgos 09001, Spain

<sup>b</sup> Instituto de Cerámica y Vidrio (CSIC), C/Kelsen 5, Madrid 28049, Spain

## TABLE OF CONTENTS

|                                                                                                                                                                          |    |
|--------------------------------------------------------------------------------------------------------------------------------------------------------------------------|----|
| S0. Gravimetric determination of alcohol exchange between $\text{Ti}(\text{OPr}^i)_4$ and EtOH to give $\text{Ti}(\text{OEt})_4$ and $\text{Pr}^i\text{OH}$ .....        | 2  |
| S1. $^1\text{H}$ NMR spectra of commercial $\text{Ti}(\text{OPr}^i)_4$ .....                                                                                             | 3  |
| S2. VT $^1\text{H}$ NMR spectra of lithium ethoxide ( $\text{LiOEt}$ ). .....                                                                                            | 4  |
| S3. $^1\text{H}$ NMR spectra of $5\text{LiOEt}:5\text{Ti}(\text{OPr}^i)_4$ .....                                                                                         | 5  |
| S4. VT $^1\text{H}$ NMR spectra of commercial $\text{Ti}(\text{OEt})_4$ .....                                                                                            | 6  |
| S5. $^1\text{H}$ NMR spectra overlay of $\text{LiOEt}$ , $5\text{LiOEt}/5\text{Ti}(\text{OPr}^i)_4$ , $\text{Ti}(\text{OEt})_4$ and $\text{Ti}(\text{OPr}^i)_4$ .....    | 7  |
| S6. $^{13}\text{C}$ NMR spectra overlay of $\text{LiOEt}$ , $5\text{LiOEt}/5\text{Ti}(\text{OPr}^i)_4$ , $\text{Ti}(\text{OEt})_4$ and $\text{Ti}(\text{OPr}^i)_4$ ..... | 8  |
| S7. Integer values of $5\text{LiOEt}/5\text{Ti}(\text{OPr}^i)_4$ between $-80^\circ\text{C}$ (bottom) and $-20^\circ\text{C}$ (top).....                                 | 9  |
| S8. VT $^1\text{H}$ NMR spectra of $4\text{LiOEt}/5\text{Ti}(\text{OPr}^i)_4$ from $-80^\circ\text{C}$ to $+80^\circ\text{C}$ .....                                      | 12 |
| S9. VT $^1\text{H}$ NMR spectra of $7\text{LiOEt}/5\text{Ti}(\text{OPr}^i)_4$ from $-80^\circ\text{C}$ to $+80^\circ\text{C}$ .....                                      | 13 |
| S10. Comparing $^1\text{H}$ NMR spectra of $5\text{LiOEt}/5\text{Ti}(\text{OPr}^i)_4$ with $7\text{LiOEt}/5\text{Ti}(\text{OPr}^i)_4$ .....                              | 14 |
| S11. VT $^1\text{H}$ NMR spectra of $10\text{LiOEt}/5\text{Ti}(\text{OPr}^i)_4$ from $-80^\circ\text{C}$ to $+80^\circ\text{C}$ .....                                    | 15 |
| S12. Cartesian coordinates and figures for optimized model structures $\text{B}-[\text{Ti}_3(\text{OMe})_{13}]^-$ and $\text{B}'-[\text{Ti}_3(\text{OMe})_{13}]^-$ ..... | 16 |

**S0. Gravimetric determination of alcohol exchange between Ti(OPr<sup>i</sup>)<sub>4</sub> and EtOH to give Ti(OEt)<sub>4</sub> and Pr<sup>i</sup>OH.**

Experimental values found during gravimetric determination. Units: grams.

Three weighted samples of 5LiOEt/5Ti(OPr<sup>i</sup>)<sub>4</sub> were independently evaporated in tared Schlenk flasks under vacuum for 7 h at room temperature. Volatile product could be ethanol with no alcohol exchange. With alcohol exchange both ethanol and isopropanol are the volatile products. The found percent mean value of solid residues was 28.2% (calculated solid residues for alcohol exchange 28.6%). With no alcohol exchange the calculated solid residue is 34.5%.

| Before formation LiOEt |       |                                    |        |        | After formation LiOEt (-1/2H <sub>2</sub> ) without exchange |                                    |                          |        | With exchange             |                      |                          |
|------------------------|-------|------------------------------------|--------|--------|--------------------------------------------------------------|------------------------------------|--------------------------|--------|---------------------------|----------------------|--------------------------|
| Sample                 | Li    | Ti(OPr <sup>i</sup> ) <sub>4</sub> | EtOH   | Weight | Li(OEt)                                                      | Ti(OPr <sup>i</sup> ) <sub>4</sub> | EtOH                     | Weight | Li(OEt)                   | Ti(OEt) <sub>4</sub> | EtOH+iPrOH               |
| 5Ti/5Li                | 0.223 | 9.66*                              | 23.76  | 33.64  | 1.671                                                        | 9.66                               | 22.28                    | 33.611 | 1.671                     | 7.753                | 24.187                   |
| %                      | 0.66% | 28.72%                             | 70.63% |        | 4.97%                                                        | 28.74%                             | 66.29%                   |        | 4.97%                     | 23.07%               | 71.96%                   |
|                        |       |                                    |        |        | Calculated solid residues                                    |                                    | Calculated volatile loss |        | Calculated solid residues |                      | Calculated volatile loss |
|                        |       |                                    |        |        | 33.7%                                                        |                                    | 66.3%                    |        | 28.0%                     |                      | 72.0%                    |

**Evaporated samples**

| Samples | Weight before evaporation | Weight after evaporation (solid residues) | Weight loss (volatiles) | Found % of solid |
|---------|---------------------------|-------------------------------------------|-------------------------|------------------|
| 1       | 1.051                     | 0.297                                     | 0.754                   | 28.26%           |
| 2       | 1.147                     | 0.325                                     | 0.822                   | 28.33%           |
| 3       | 1.149                     | 0.321                                     | 0.828                   | 27.94%           |
|         |                           | Found mean value                          |                         | 28.2%            |

The gravimetric results indicate that alcohol exchange occurs according to the reaction:

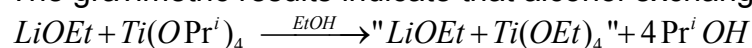

## S1. $^1\text{H}$ NMR spectra of commercial $\text{Ti}(\text{OPri})_4$ .

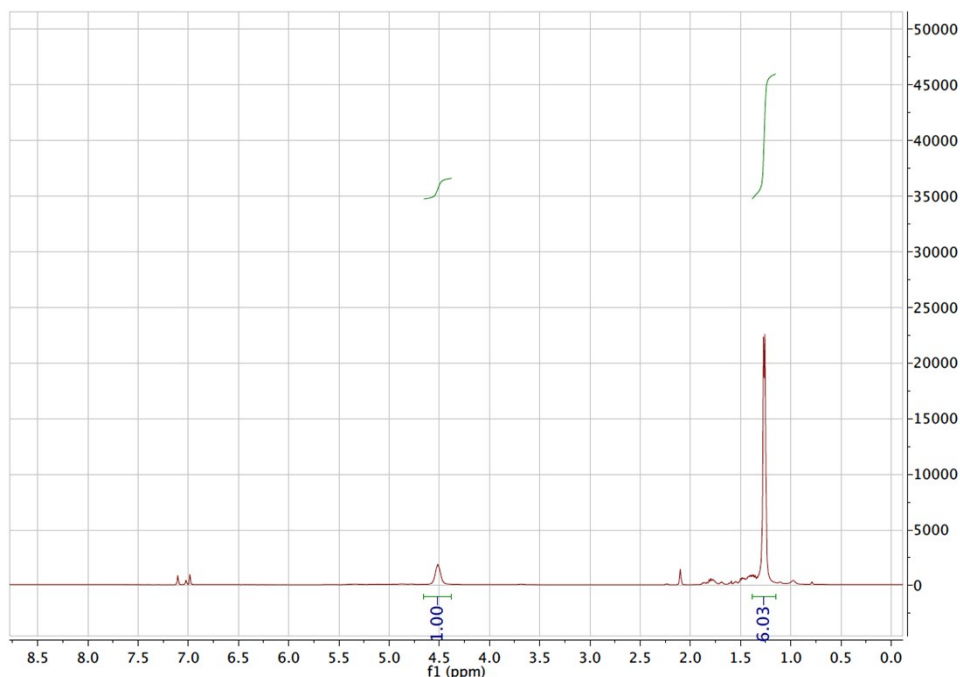

Top  $+20^\circ\text{C}$ . Bottom  $-20^\circ\text{C}$ . Shifts referred to signal of residual non-deuterated toluene at 2.10 ppm. In addition to residual signals of non-deuterated toluene the commercial sample shows impurities in the range 1-2 ppm. Septuplet is well resolved at  $-20^\circ\text{C}$  below.

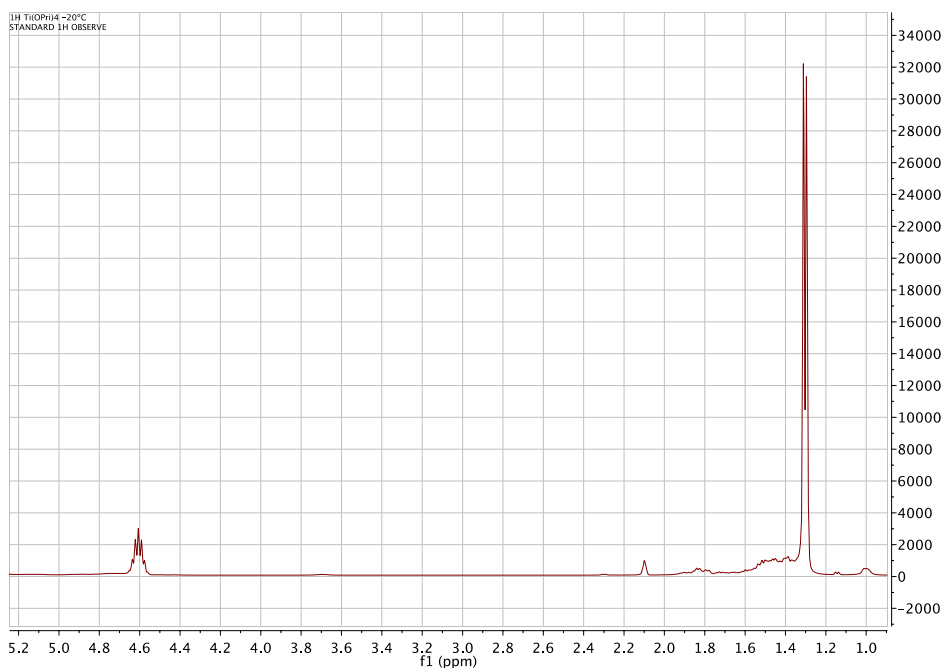

**Procedure to prepare the sample:** Commercial  $\text{Ti}(\text{OPri})_4$  (0.5 ml) was dissolved in 1 ml of toluene- $\text{d}_8$ . The calculated concentration is 1.1M.

## S2. VT $^1\text{H}$ NMR spectra of lithium ethoxide (LiOEt).

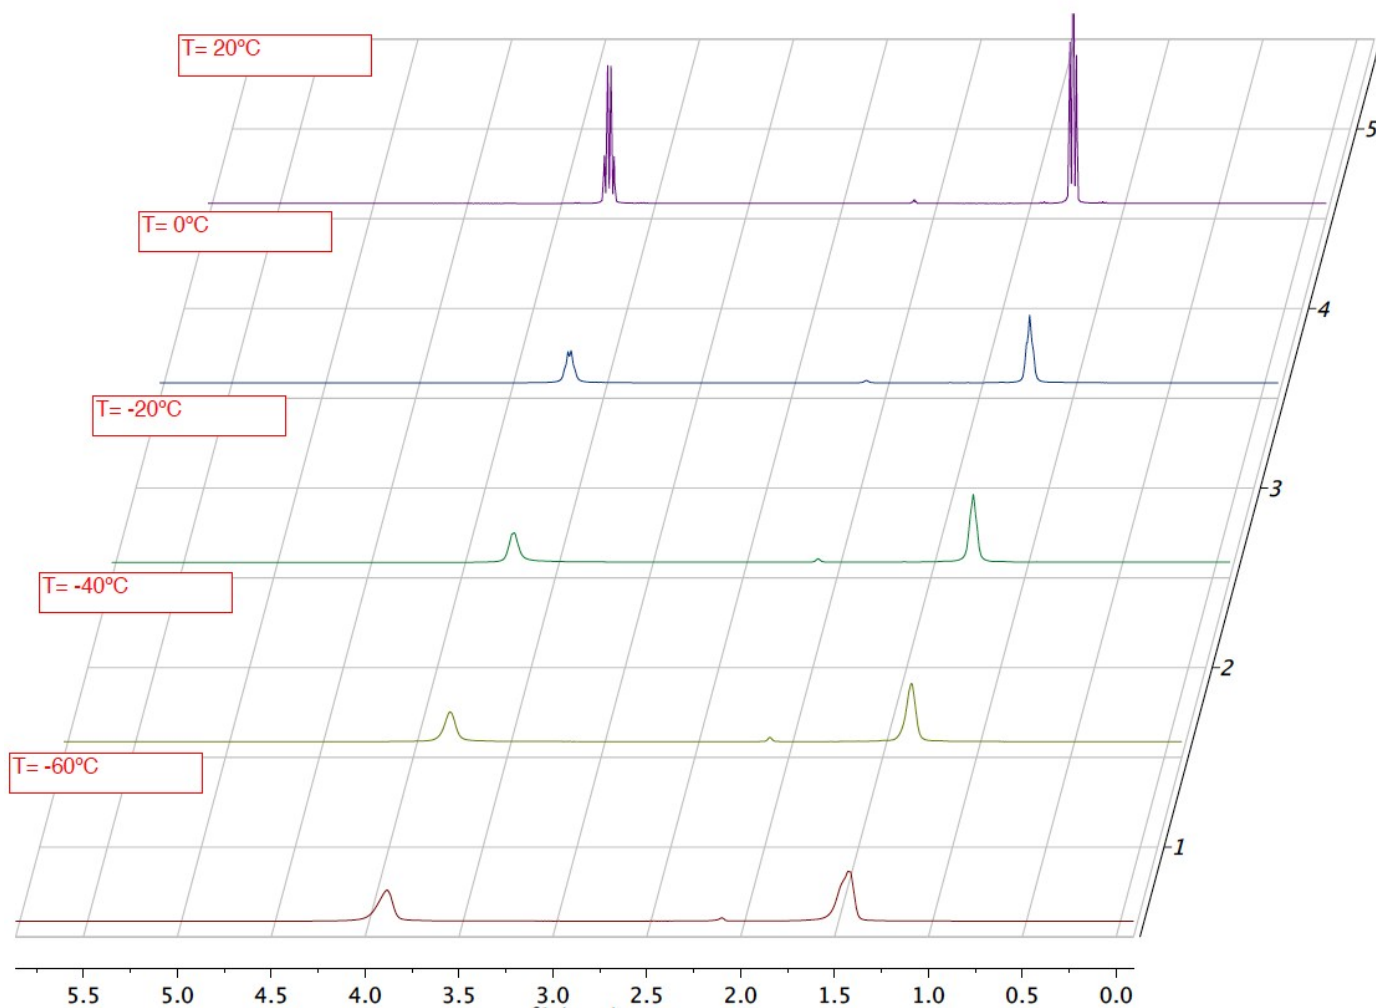

Variable temperature  $^1\text{H}$  NMR spectra of lithium ethoxide in  $d_8$ -toluene. Shifts referred to signal of residual non-deuterated toluene at 2.10 ppm. Chemical shifts drift slightly with temperature between 3.72 ppm(20°) and 3.88 ppm(-60°) for the methylene group and between 1.25 ppm(20°) and 1.43 ppm(-60°) for the methyl group. Coupling values  $^2J = 7$  Hz. only observed at 20°C.

**Procedure to prepare the sample:** Lithium ethoxide was prepared by solving metallic lithium (0.298g, 43 mmol) in 40 ml of ethanol. An aliquot of 1.5 ml was evaporated to dryness. The residue was dissolved in 1.5 ml of deuterated toluene. The calculated concentration is 1,07M.

### S3. $^1\text{H}$ NMR spectra of $5\text{LiOEt}:5\text{Ti}(\text{OPr}^i)_4$ .

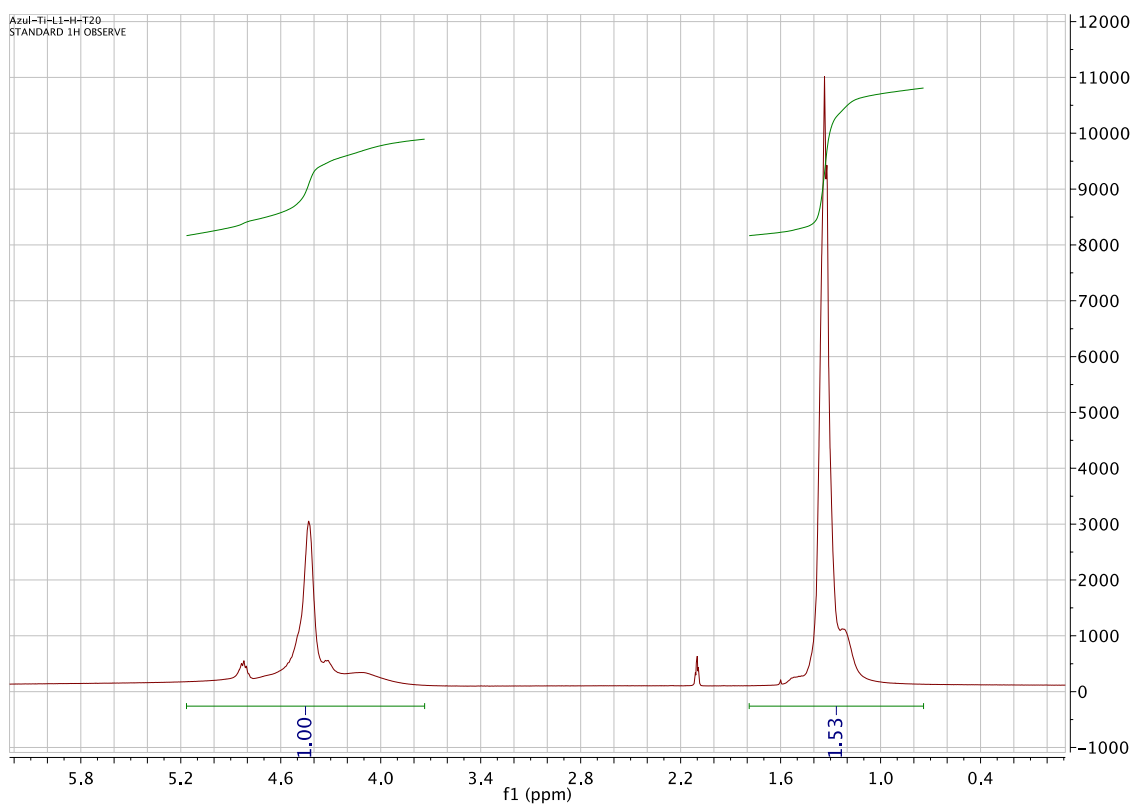

$^1\text{H}$  NMR spectrum, at  $20^\circ\text{C}$  in  $\text{C}_6\text{D}_5\text{CD}_3$  (1 ml), of an evaporated aliquot (1.5 ml) of the precursor  $5\text{LiOEt}/5\text{Ti}(\text{OPr}^i)_4$ . See the integer ratio 1:1.5 between methylene:methyl protons as expected for a mixture containing only ethoxide groups. (Signal at 2.1 ppm of residual toluene).

#### S4. VT $^1\text{H}$ NMR spectra of commercial $\text{Ti}(\text{OEt})_4$ .

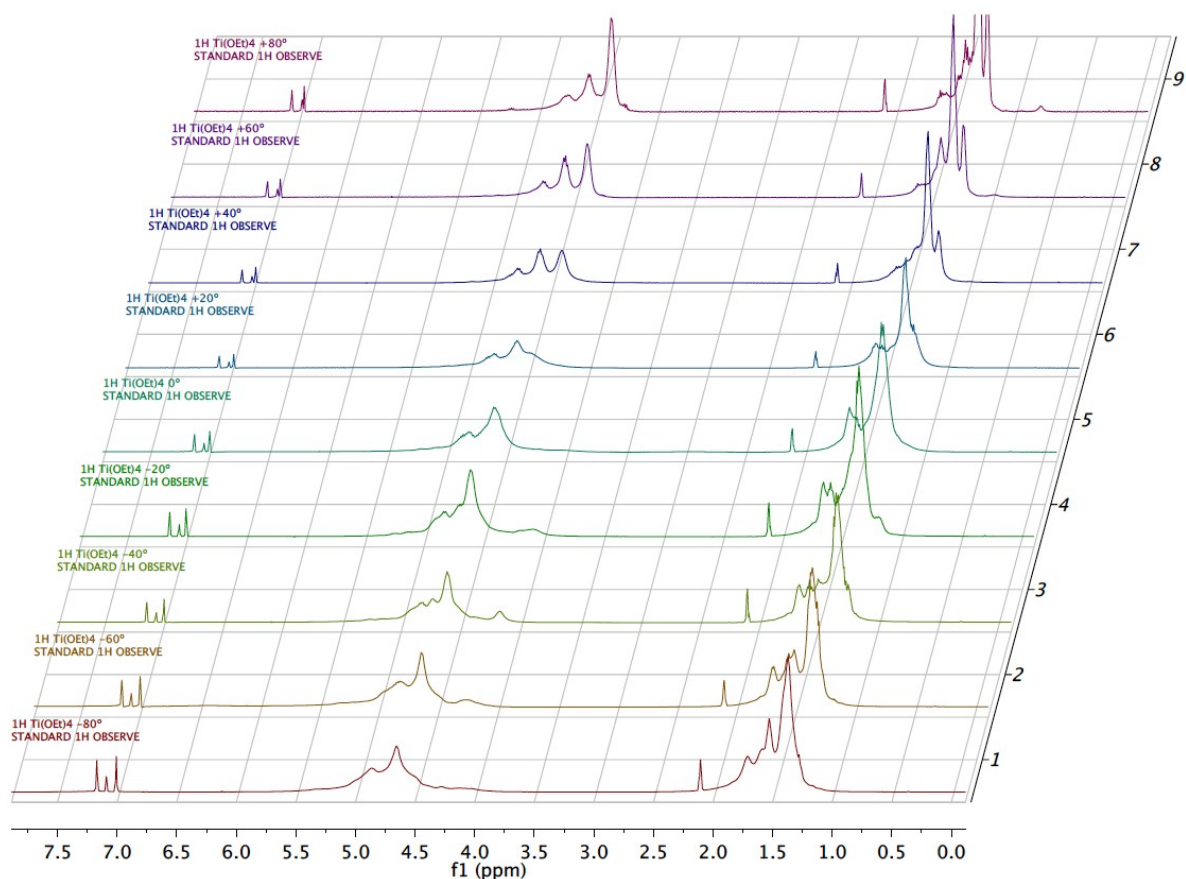

Variable temperature  $^1\text{H}$  NMR spectra of commercial  $\text{Ti}(\text{OEt})_4$  in  $d_8$ -toluene. From  $-80^\circ\text{C}$  (bottom) to  $+80^\circ\text{C}$  (top) in  $20^\circ\text{C}$  steps.

**Procedure to prepare the sample:** Commercial  $\text{Ti}(\text{OEt})_4$  (0.3 ml) was dissolved in 1.5 ml of deuterated toluene. The calculated concentration is 0.9M.

**S5.  $^1\text{H}$  NMR spectra overlay of LiOEt,  $5\text{LiOEt}/5\text{Ti}(\text{OPr}^i)_4$ ,  $\text{Ti}(\text{OEt})_4$  and  $\text{Ti}(\text{OPr}^i)_4$ .**

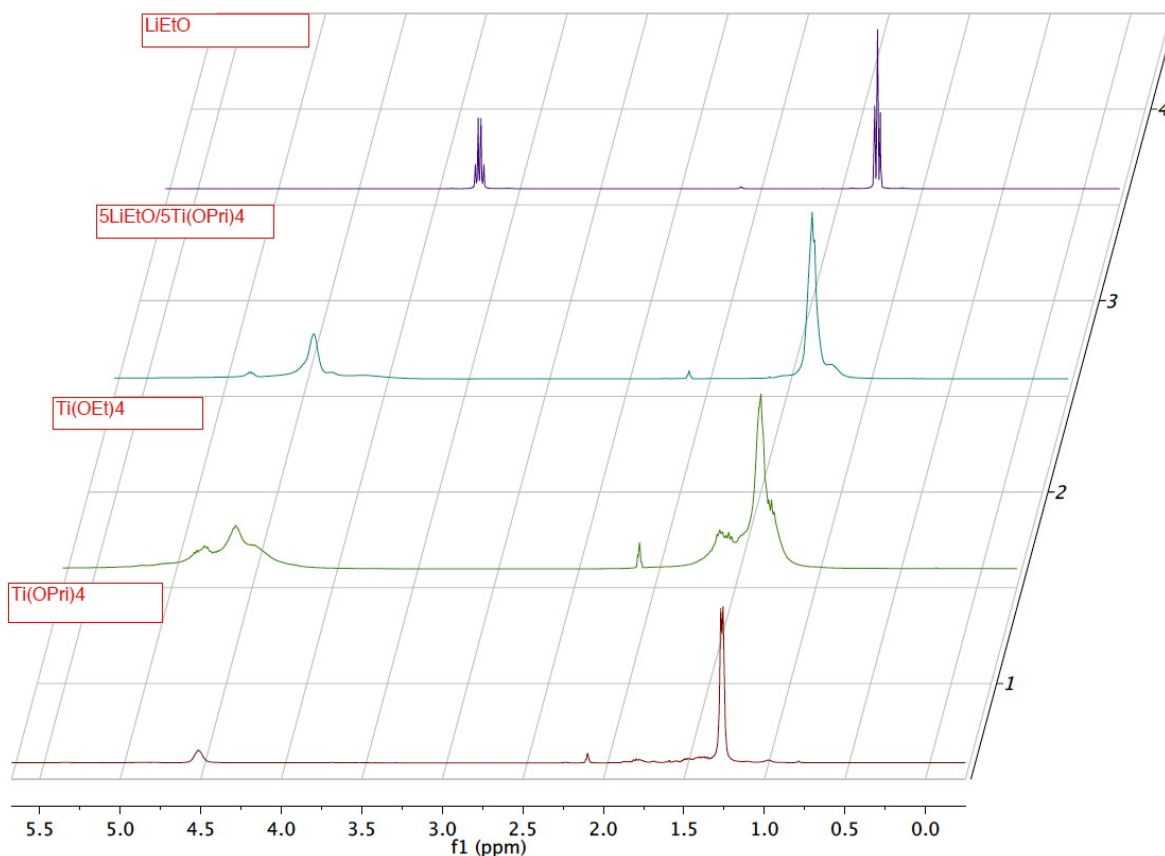

$^1\text{H}$  NMR spectra of LiOEt,  $5\text{LiOEt}/5\text{Ti}(\text{OPr}^i)_4$ ,  $\text{Ti}(\text{OEt})_4$  and  $\text{Ti}(\text{OPr}^i)_4$  in  $d_8$ -toluene at  $20^\circ\text{C}$ . See that  $5\text{LiOEt}/5\text{Ti}(\text{OPr}^i)_4$  is not the simple addition of LiOEt and  $\text{Ti}(\text{OPr}^i)_4$  or LiOEt and  $\text{Ti}(\text{OEt})_4$ . No free LiOEt appears in  $5\text{LiOEt}/5\text{Ti}(\text{OPr}^i)_4$ . New double lithium-titanium ethoxides have formed.

S6.  $^{13}\text{C}$  NMR spectra overlay of LiOEt,  $5\text{LiOEt}/5\text{Ti}(\text{OPri})_4$ ,  $\text{Ti}(\text{OEt})_4$  and  $\text{Ti}(\text{OPri})_4$ .

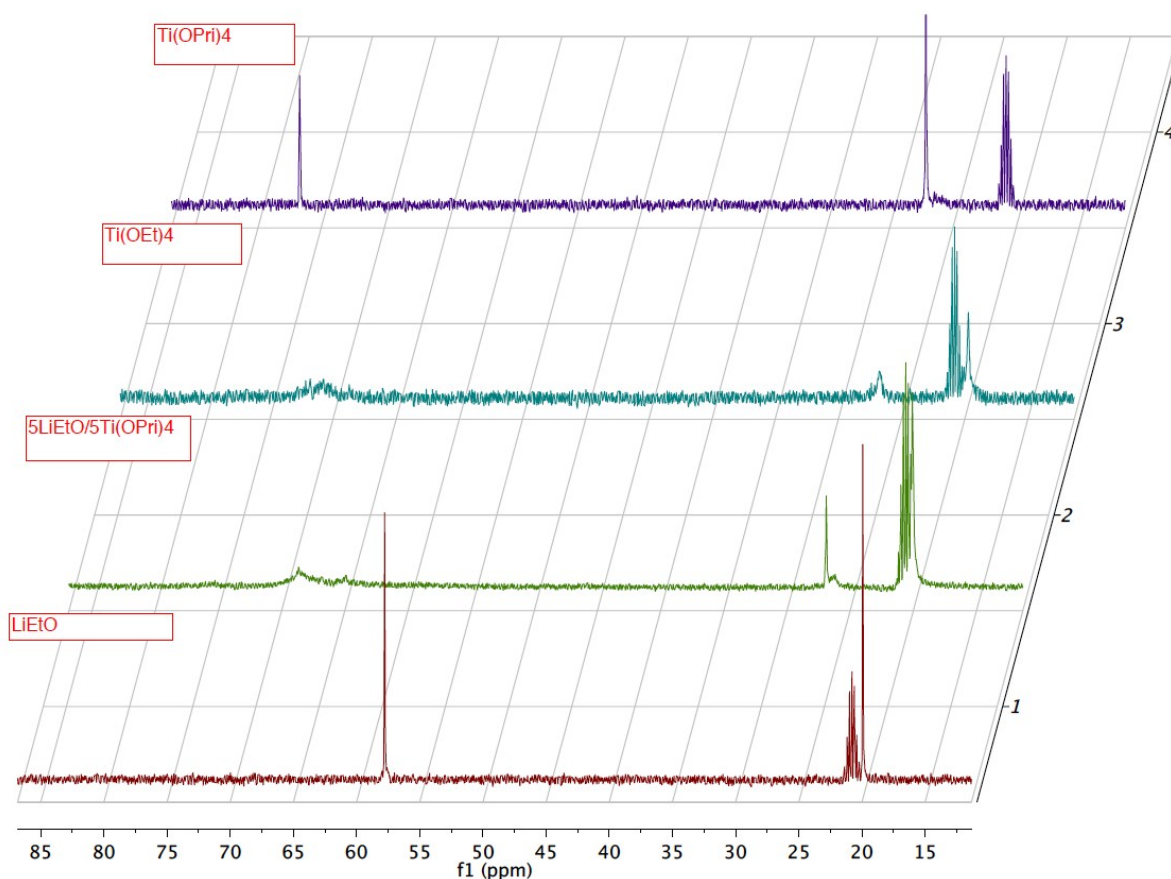

$^{13}\text{C}$  NMR spectra of LiOEt,  $5\text{LiOEt}/5\text{Ti}(\text{OPri})_4$ ,  $\text{Ti}(\text{OEt})_4$  and  $\text{Ti}(\text{OPri})_4$  in  $d_8$ -toluene at  $20^\circ\text{C}$ . See that  $5\text{LiOEt}/5\text{Ti}(\text{OPri})_4$  is not the simple addition of LiOEt and  $\text{Ti}(\text{OPri})_4$  or LiOEt and  $\text{Ti}(\text{OEt})_4$ . No free LiOEt neither  $\text{Ti}(\text{OPri})_4$  appear in  $5\text{LiOEt}/5\text{Ti}(\text{OPri})_4$ . New double lithium-titanium ethoxides have formed. Shifts referred to signal of toluene at 20.6ppm.



**S7. Integer values of 5LiOEt/5Ti(OPr<sup>i</sup>)<sub>4</sub> between -80°C(bottom) and -20°C(top).**

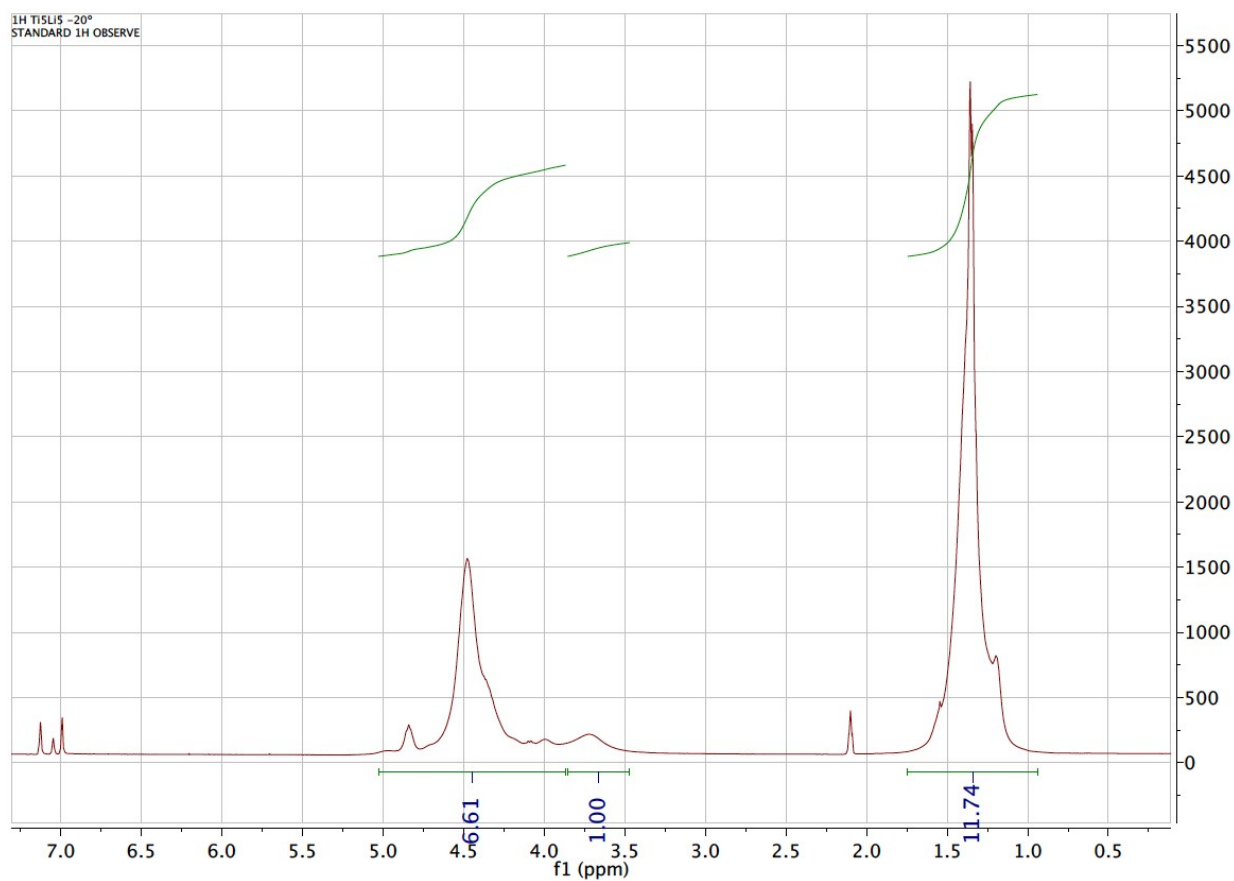

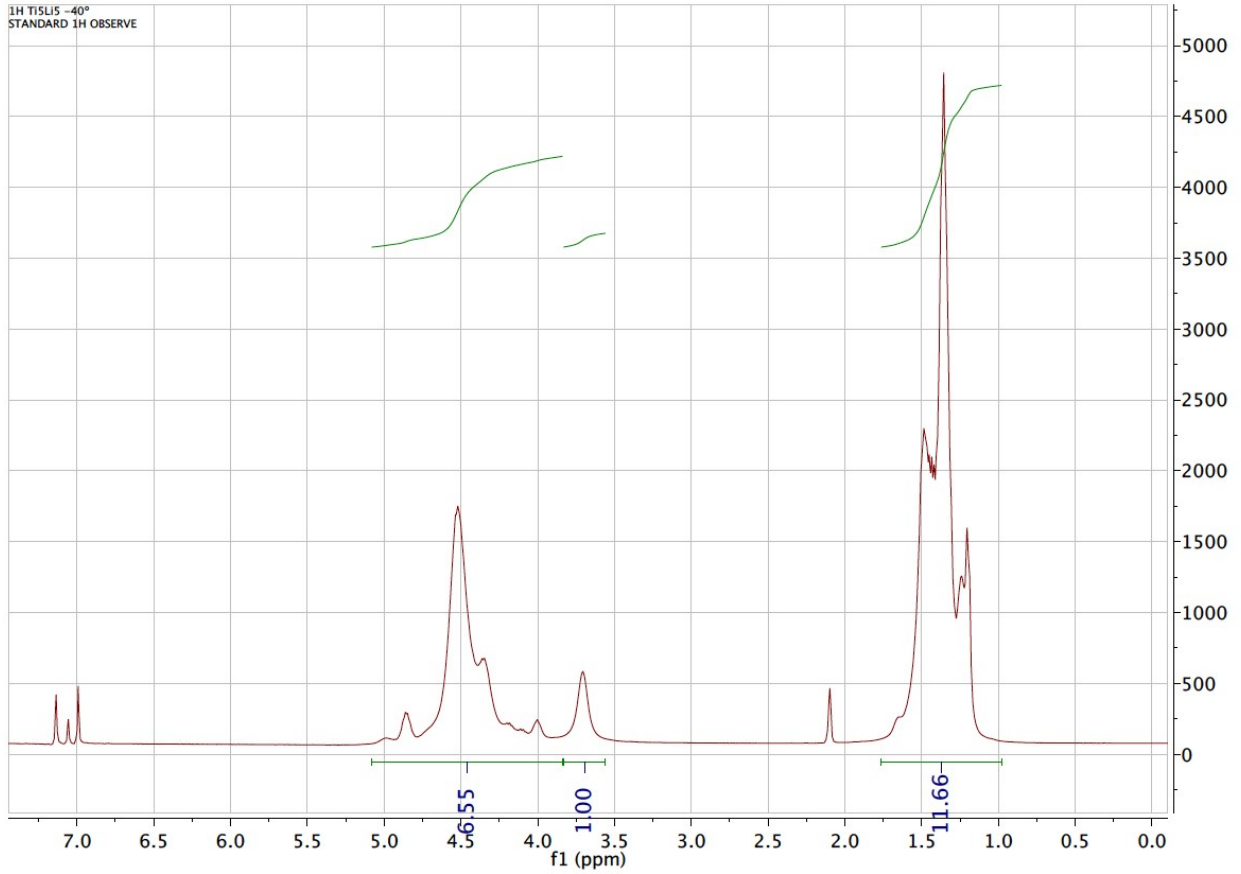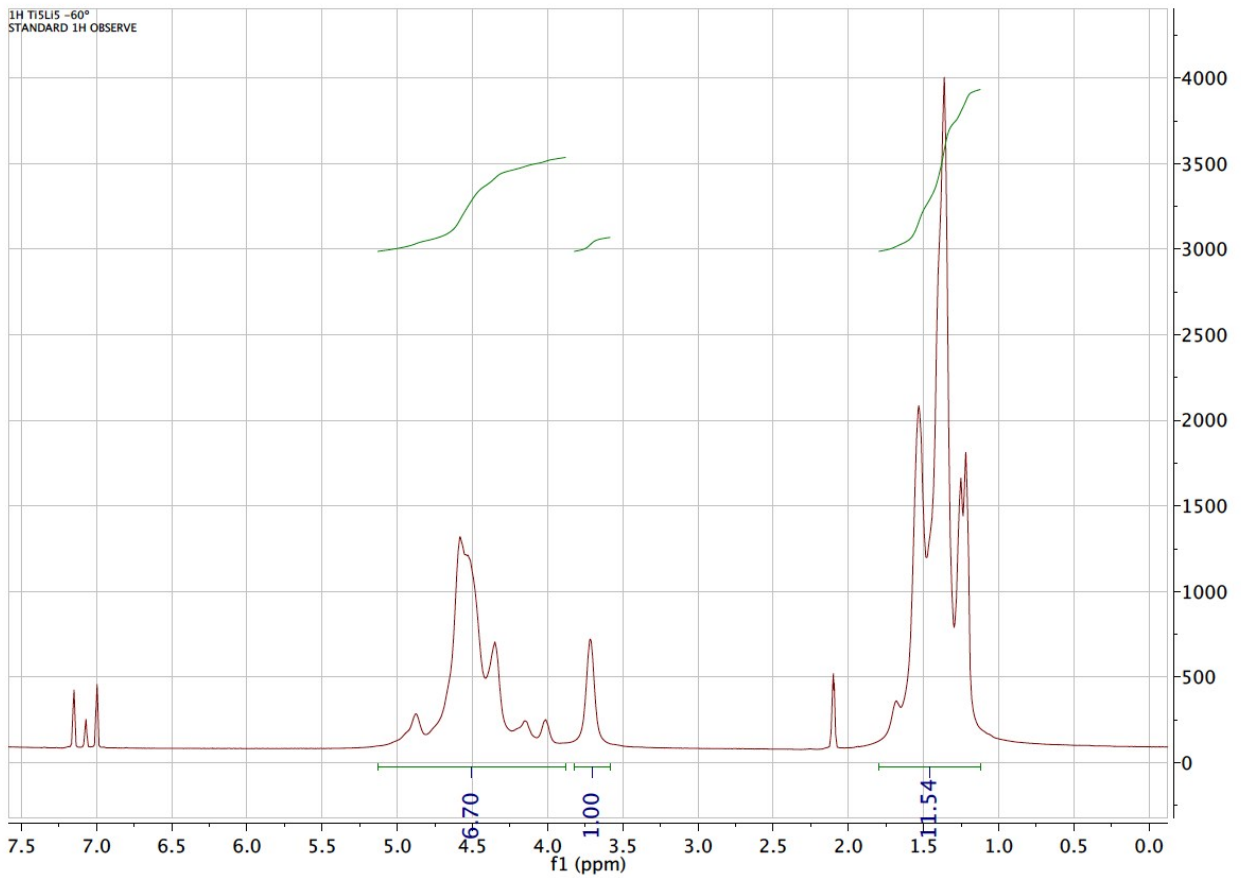

1H T1SLIS -80°  
STANDARD 1H OBSERVE

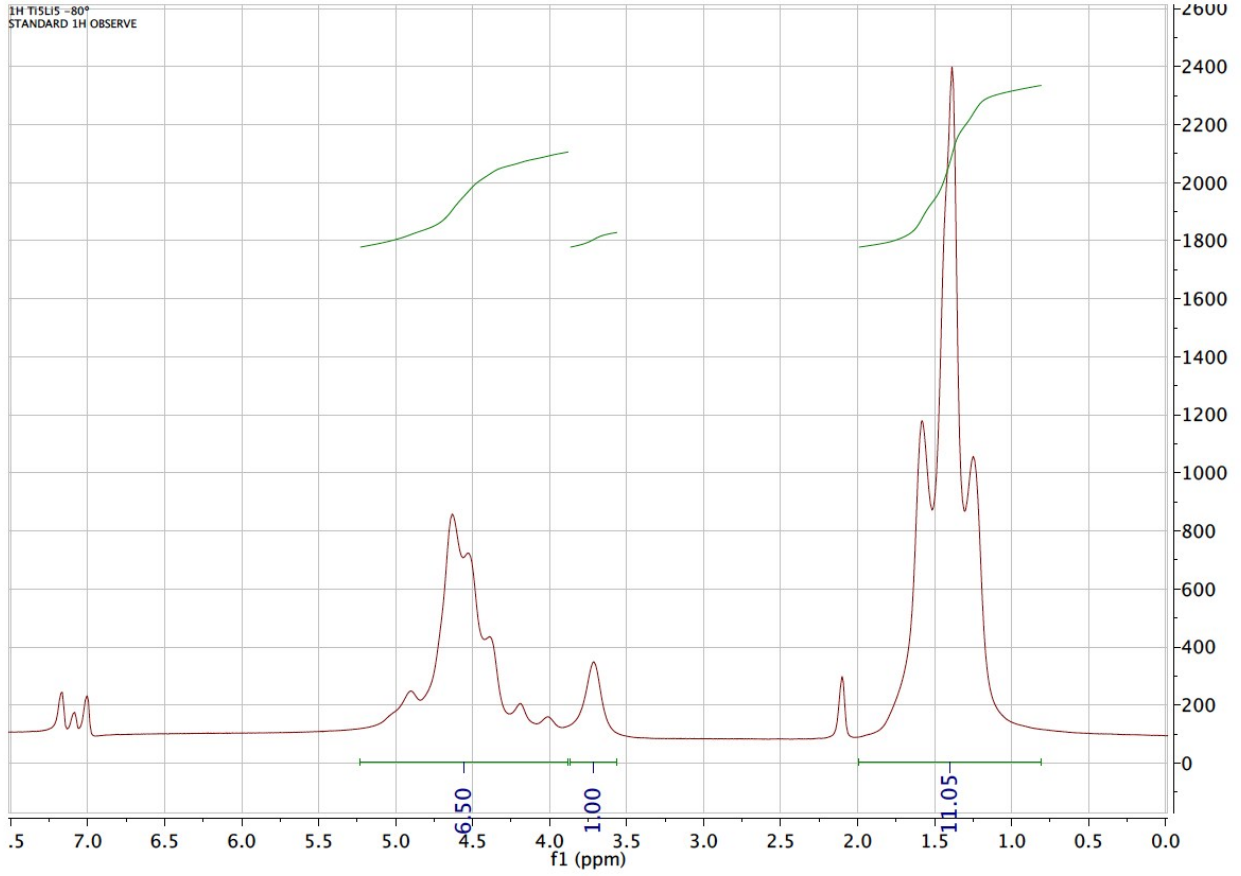

## S8. VT $^1\text{H}$ NMR spectra of $4\text{LiOEt}/5\text{Ti}(\text{OPri})_4$ from $-80^\circ\text{C}$ to $+80^\circ\text{C}$

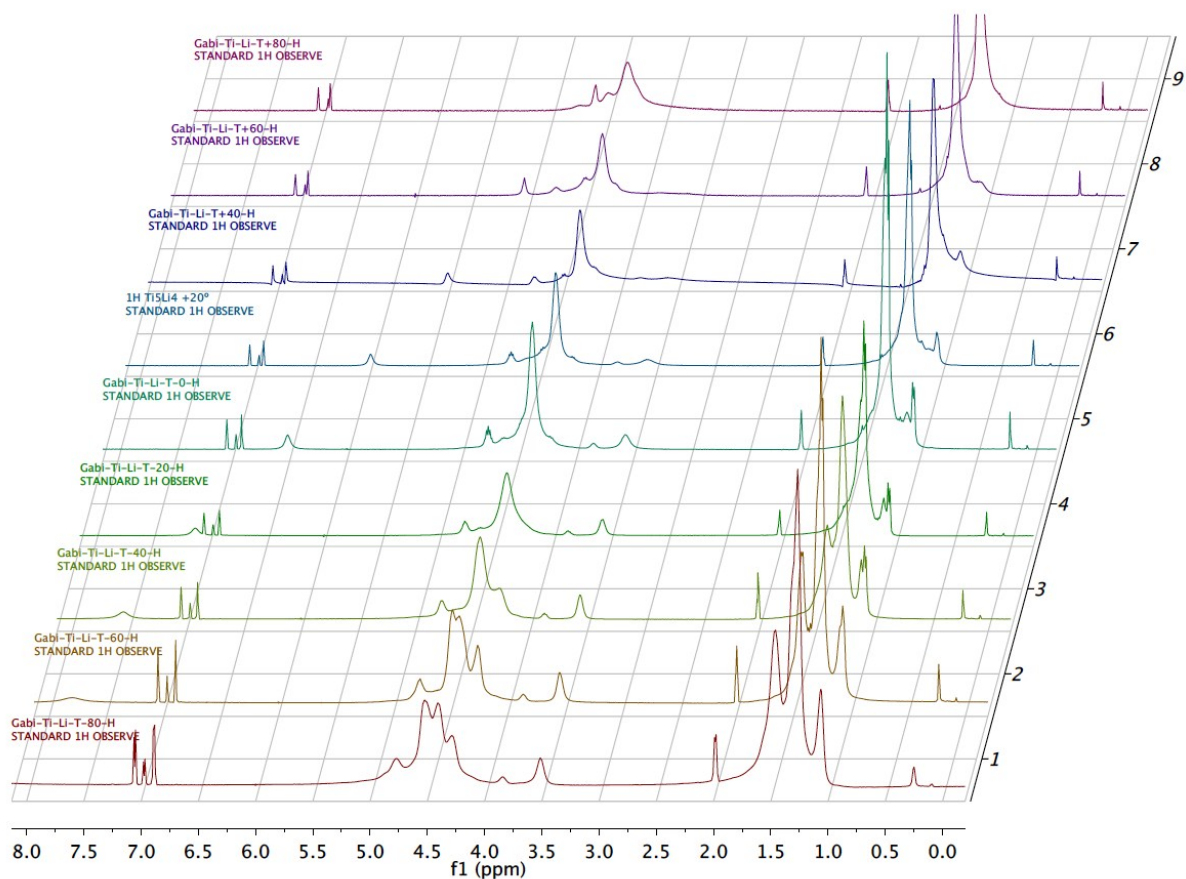

Variable temperature (VT)  $^1\text{H}$  NMR spectra in  $\text{C}_6\text{D}_5\text{CD}_3$  of the precursor  $4\text{LiOEt}/5\text{Ti}(\text{OPri})_4$  ( $4\text{Li}/5\text{Ti}$ ). The calculated concentration for Ti is 0.82M and for Li is 0.64M. Top  $+80^\circ\text{C}$ . Bottom  $-80^\circ\text{C}$ . Steps  $20^\circ\text{C}$ .

### S9. VT $^1\text{H}$ NMR spectra of $7\text{LiOEt}/5\text{Ti}(\text{OPri})_4$ from $-80^\circ\text{C}$ to $+80^\circ\text{C}$

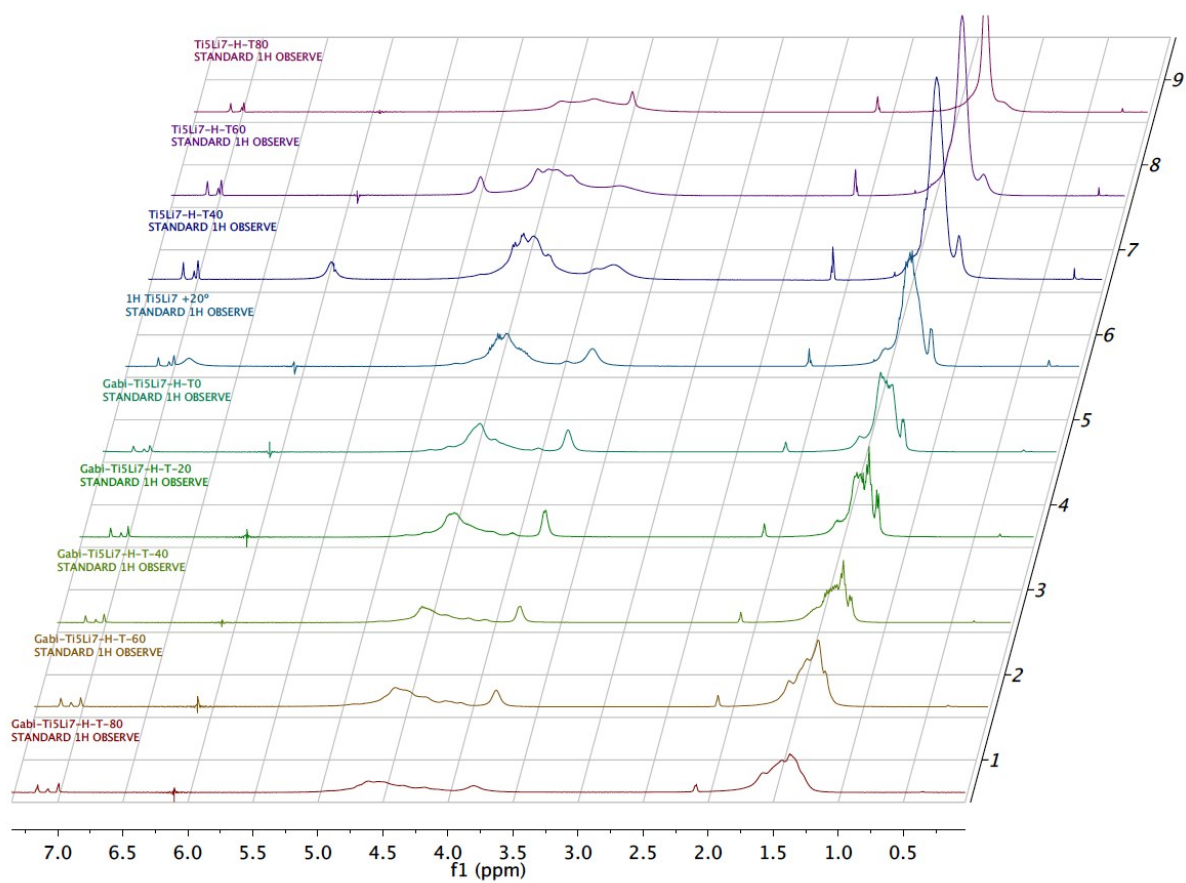

### S10. Comparing $^1\text{H}$ NMR spectra of $5\text{LiOEt}/5\text{Ti}(\text{OPr}^i)_4$ with $7\text{LiOEt}/5\text{Ti}(\text{OPr}^i)_4$

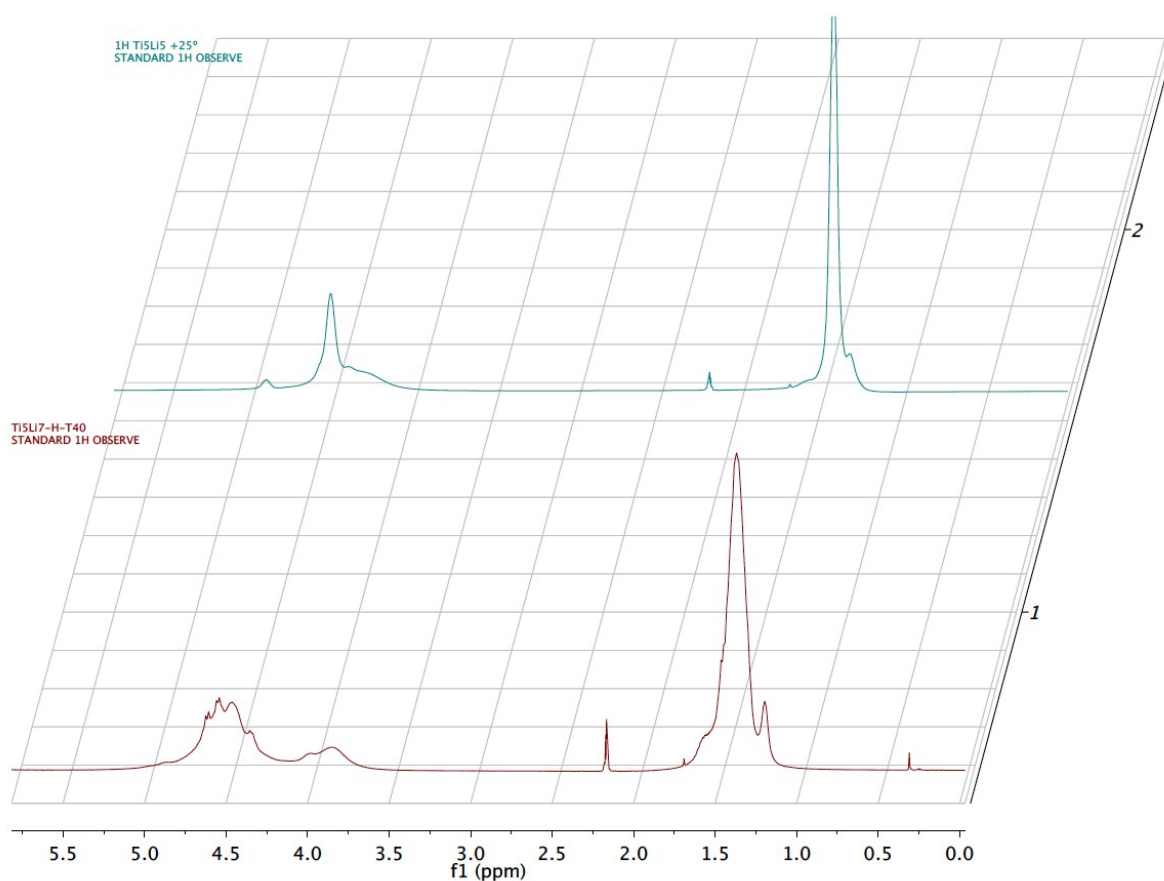

Top  $^1\text{H}$  NMR spectra of  $5\text{LiOEt}/5\text{Ti}(\text{OPr}^i)_4$  at  $20^\circ\text{C}$ . Bottom  $7\text{LiOEt}/5\text{Ti}(\text{OPr}^i)_4$  at  $40^\circ\text{C}$ . Chemical exchange is hampered down.

# S11. VT $^1\text{H}$ NMR spectra of $10\text{LiOEt}/5\text{Ti}(\text{OPr}^i)_4$ from $-80^\circ\text{C}$ to $+80^\circ\text{C}$

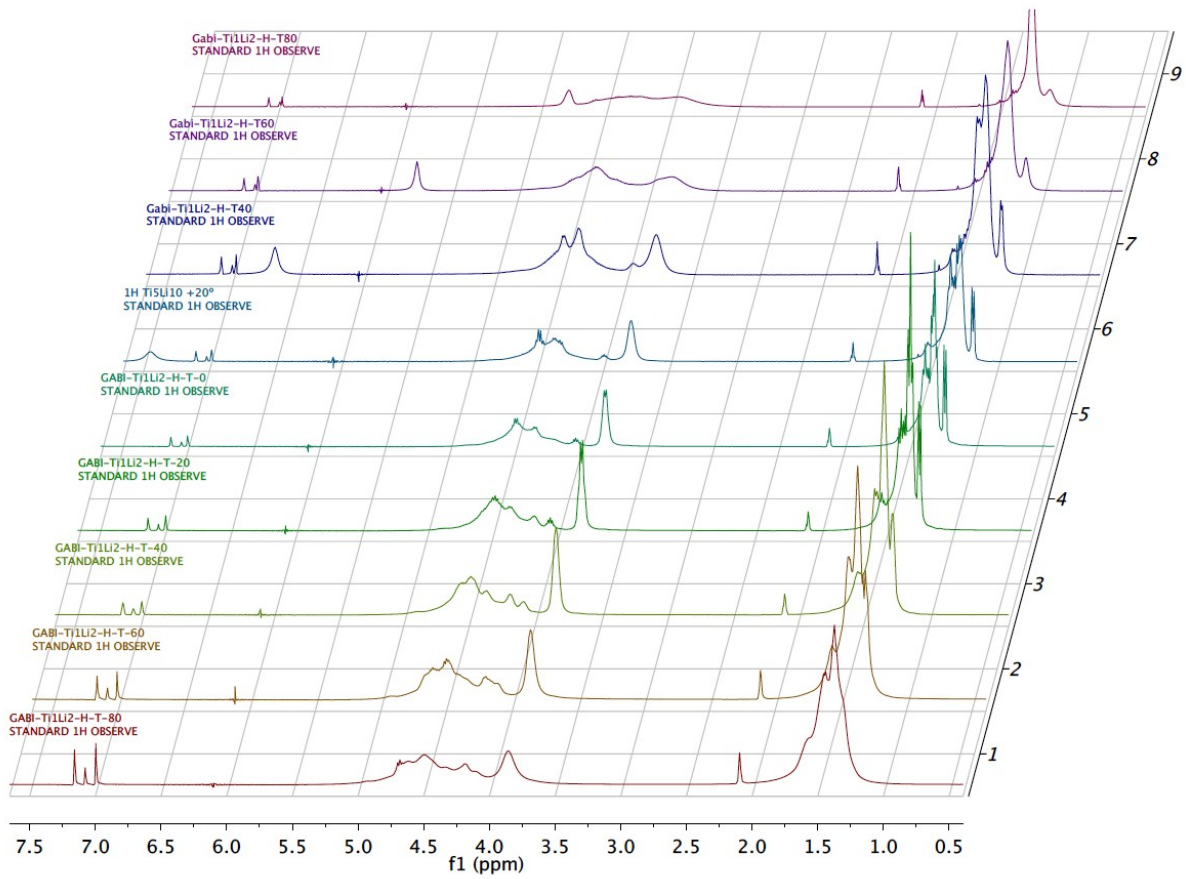

**S12. Cartesian coordinates and figures for optimized model structures B- $[\text{Ti}_3(\text{OMe})_{13}]^-$  and B'- $[\text{Ti}_3(\text{OMe})_{13}]^-$ .**

Cartesian coordinates for optimized structure of B- $[\text{Ti}_3(\text{OMe})_{13}]^-$ .

| Center Number | Atomic Number | Coordinates (Angstroms) |            |           |
|---------------|---------------|-------------------------|------------|-----------|
|               |               | X                       | Y          | Z         |
| 1             | 22            | -0.133536               | 0.157714   | -0.466692 |
| 2             | 8             | 1.032.267               | -0.427668  | 0.953438  |
| 3             | 8             | 1.596.960               | 0.339569   | -1.392689 |
| 4             | 8             | -1.673.669              | 0.068587   | 1.066277  |
| 5             | 8             | -2.132.143              | 0.346925   | -1.305632 |
| 6             | 22            | -3.431.497              | -0.031223  | 0.174183  |
| 7             | 22            | 3.116.197               | 0.020978   | 0.226739  |
| 8             | 8             | -0.379656               | -1.499.445 | -1.308901 |
| 9             | 8             | 3.205.582               | -1.828.557 | -0.205581 |
| 10            | 8             | 3.856.294               | -0.243490  | 1.930179  |
| 11            | 8             | 4.562.905               | 0.372564   | -0.893485 |
| 12            | 8             | 2.854.666               | 1.828.872  | 0.656901  |
| 13            | 8             | -0.240351               | 2.002.322  | -0.435260 |
| 14            | 8             | -4.418.462              | 1.486.731  | -0.129138 |
| 15            | 8             | -4.268.907              | -0.421074  | 1.797091  |
| 16            | 8             | -4.100.720              | -1.517.046 | -0.661347 |
| 17            | 6             | 4.073.000               | -2.632.876 | -0.934132 |
| 18            | 1             | 4.634.005               | -3.321.042 | -0.273757 |
| 19            | 1             | 3.514.798               | -3.258.537 | -1.655427 |
| 20            | 1             | 4.805.470               | -2.029.069 | -1.495782 |
| 21            | 6             | 4.484.950               | -1.355.327 | 2.493044  |
| 22            | 1             | 4.341.978               | -1.355.352 | 3.587991  |
| 23            | 1             | 4.087.347               | -2.299.481 | 2.088703  |
| 24            | 1             | 5.572.379               | -1.336.358 | 2.299643  |
| 25            | 6             | 5.399.125               | 1.491.232  | -0.961616 |
| 26            | 1             | 6.252.529               | 1.386.487  | -0.269484 |
| 27            | 1             | 5.804.103               | 1.596.122  | -1.982821 |
| 28            | 1             | 4.857.262               | 2.412.098  | -0.696053 |
| 29            | 6             | 2.642.941               | 2.573.453  | 1.810817  |
| 30            | 1             | 3.124.320               | 2.097.705  | 2.682519  |
| 31            | 1             | 3.056.940               | 3.591.912  | 1.698444  |
| 32            | 1             | 1.564.145               | 2.673.405  | 2.019634  |
| 33            | 6             | -0.978867               | 3.118.168  | -0.819602 |
| 34            | 1             | -0.910565               | 3.896.315  | -0.041797 |
| 35            | 1             | -0.583149               | 3.550.138  | -1.755340 |
| 36            | 1             | -2.038.564              | 2.865.024  | -0.970102 |
| 37            | 6             | 0.498824                | -2.447.541 | -1.856928 |
| 38            | 1             | 0.831376                | -3.167.333 | -1.095498 |



|    |   |            |            |           |
|----|---|------------|------------|-----------|
| 39 | 1 | -0.015314  | -3.002.654 | -2.660916 |
| 40 | 1 | 1.393.499  | -1.960.950 | -2.265075 |
| 41 | 6 | -5.685.953 | 1.889.498  | 0.319734  |
| 42 | 1 | -5.896.794 | 1.480.860  | 1.319066  |
| 43 | 1 | -5.724.880 | 2.988.574  | 0.365710  |
| 44 | 1 | -6.471.530 | 1.546.243  | -0.372195 |
| 45 | 6 | -4.572.362 | -1.606.177 | 2.470449  |
| 46 | 1 | -3.690.853 | -2.002.624 | 3.002565  |
| 47 | 1 | -5.363.384 | -1.427.019 | 3.216881  |
| 48 | 1 | -4.923.519 | -2.378.121 | 1.766053  |
| 49 | 6 | -3.636.156 | -2.563.906 | -1.480663 |
| 50 | 1 | -2.553.714 | -2.492.007 | -1.642644 |
| 51 | 1 | -3.862.788 | -3.531.192 | -1.006104 |
| 52 | 1 | -4.151.907 | -2.534.138 | -2.453093 |
| 53 | 6 | -2.369.560 | 0.298420   | -2.691969 |
| 54 | 1 | -1.795.550 | -0.518513  | -3.150855 |
| 55 | 1 | -3.437.637 | 0.141396   | -2.898839 |
| 56 | 1 | -2.069.334 | 1.249.358  | -3.160651 |
| 57 | 6 | 1.857.285  | 1.361.992  | -2.334508 |
| 58 | 1 | 1.905.325  | 2.338.981  | -1.836663 |
| 59 | 1 | 2.818.135  | 1.158.256  | -2.824295 |
| 60 | 1 | 1.070.557  | 1.391.502  | -3.104920 |
| 61 | 6 | -1.491.767 | 0.741587   | 2.307130  |
| 62 | 1 | -0.512067  | 0.485596   | 2.721259  |
| 63 | 1 | -1.525.762 | 1.829.621  | 2.158496  |
| 64 | 1 | -2.285.155 | 0.448356   | 3.004061  |
| 65 | 6 | 0.853397   | -1.572.053 | 1.774230  |
| 66 | 1 | 1.303.333  | -1.379.114 | 2.757364  |
| 67 | 1 | -0.213603  | -1.790.108 | 1.899402  |
| 68 | 1 | 1.355.677  | -2.433.786 | 1.320725  |

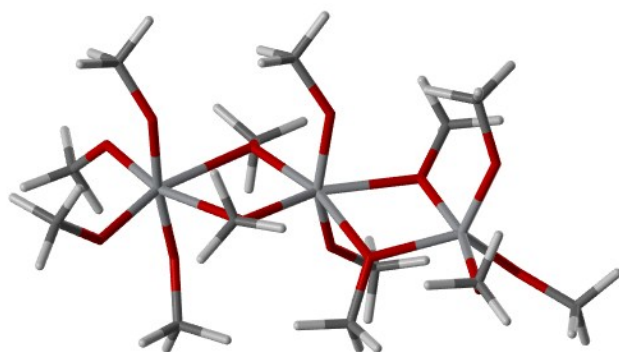

Optimized structure of B-[Ti<sub>3</sub>(OMe)<sub>13</sub>].

Cartesian coordinates for optimized structure of  $B^+-[Ti_3(OMe)_{13}]^-$ .

| Center Number | Atomic Number | Coordinates (Angstroms) |            |           |
|---------------|---------------|-------------------------|------------|-----------|
|               |               | X                       | Y          | Z         |
| 1             | 22            | 3.190.206               | -0.517074  | 0.095098  |
| 2             | 8             | -1.051.870              | -0.709603  | 0.439267  |
| 3             | 8             | 1.636.100               | 0.913509   | 0.701304  |
| 4             | 22            | -2.968.348              | -0.607780  | 0.046918  |
| 5             | 22            | -0.238658               | 1.328.494  | 0.107218  |
| 6             | 8             | -2.327.905              | 1.238.358  | -0.376131 |
| 7             | 8             | -0.776344               | 1.638.390  | 1.881425  |
| 8             | 8             | -0.097774               | 3.151.615  | -0.208387 |
| 9             | 8             | 0.085838                | 0.876419   | -1.663859 |
| 10            | 8             | -3.133.918              | -2.460.076 | 0.248357  |
| 11            | 8             | -4.135.490              | -0.217838  | 1.391996  |
| 12            | 8             | -3.775.813              | -0.630921  | -1.635257 |
| 13            | 8             | 1.984.128               | -1.537.190 | -0.833725 |
| 14            | 8             | 4.665.977               | -1.612.428 | -0.279566 |
| 15            | 8             | 3.996.067               | 0.908614   | -0.777594 |
| 16            | 8             | 3.378.527               | -0.894673  | 1.894617  |
| 17            | 6             | 4.347.295               | -1.493.512 | 2.703089  |
| 18            | 1             | 3.875.393               | -2.224.696 | 3.379662  |
| 19            | 1             | 5.101.198               | -2.011.635 | 2.090244  |
| 20            | 1             | 4.856.566               | -0.737977  | 3.325106  |
| 21            | 6             | 3.505.766               | 2.017.114  | -1.490155 |
| 22            | 1             | 3.418.612               | 2.893.775  | -0.829560 |
| 23            | 1             | 4.209.034               | 2.268.711  | -2.300905 |
| 24            | 1             | 2.517.123               | 1.820.398  | -1.923195 |
| 25            | 6             | 1.889.839               | -2.899.580 | -1.136903 |
| 26            | 1             | 1.199.309               | -3.405.680 | -0.443761 |
| 27            | 1             | 1.498.072               | -3.029.557 | -2.158225 |
| 28            | 1             | 2.873.271               | -3.390.806 | -1.068807 |
| 29            | 6             | 5.532.582               | -1.608.409 | -1.376266 |
| 30            | 1             | 5.797.698               | -0.578199  | -1.662261 |
| 31            | 1             | 6.456.504               | -2.157.533 | -1.128208 |
| 32            | 1             | 5.075.613               | -2.098.451 | -2.254199 |
| 33            | 6             | -1.728.749              | 2.468.775  | 2.466310  |
| 34            | 1             | -1.593.301              | 3.516.322  | 2.141963  |
| 35            | 1             | -2.750.466              | 2.154.187  | 2.199731  |
| 36            | 1             | -1.637.500              | 2.436.332  | 3.566118  |
| 37            | 6             | 0.170358                | 3.910.475  | -1.351265 |
| 38            | 1             | 0.313718                | 3.271.286  | -2.235566 |
| 39            | 1             | -0.659453               | 4.609.379  | -1.550664 |
| 40            | 1             | 1.083.799               | 4.509.444  | -1.200855 |

|    |   |            |            |           |
|----|---|------------|------------|-----------|
| 41 | 6 | -0.284474  | 0.048641   | -2.720897 |
| 42 | 1 | -1.373.023 | -0.115078  | -2.742061 |
| 43 | 1 | 0.013549   | 0.499832   | -3.683675 |
| 44 | 1 | 0.215228   | -0.926632  | -2.631058 |
| 45 | 6 | -4.955.873 | -0.948593  | 2.262813  |
| 46 | 1 | -6.014.909 | -0.715469  | 2.070735  |
| 47 | 1 | -4.800.778 | -2.029.985 | 2.133094  |
| 48 | 1 | -4.728.114 | -0.678016  | 3.304879  |
| 49 | 6 | -4.845.642 | -1.385.051 | -2.132487 |
| 50 | 1 | -4.977.937 | -2.328.309 | -1.579184 |
| 51 | 1 | -5.788.321 | -0.816174  | -2.064515 |
| 52 | 1 | -4.673.714 | -1.624.940 | -3.194445 |
| 53 | 6 | -2.581.750 | -3.556.712 | -0.422902 |
| 54 | 1 | -3.011.199 | -4.493.603 | -0.032873 |
| 55 | 1 | -2.784.633 | -3.509.702 | -1.505399 |
| 56 | 1 | -1.489.382 | -3.597.880 | -0.290840 |
| 57 | 6 | -0.526157  | -1.453.417 | 1.535335  |
| 58 | 1 | -1.115.550 | -2.365.464 | 1.690014  |
| 59 | 1 | 0.514341   | -1.717.609 | 1.324638  |
| 60 | 1 | -0.556704  | -0.843802  | 2.447054  |
| 61 | 6 | -2.939.565 | 2.199.306  | -1.207358 |
| 62 | 1 | -2.383.804 | 2.308.039  | -2.149809 |
| 63 | 1 | -3.967.486 | 1.899.333  | -1.445719 |
| 64 | 1 | -2.952.409 | 3.172.848  | -0.697281 |
| 65 | 6 | 2.125.352  | 1.754.546  | 1.750836  |
| 66 | 1 | 1.890.020  | 1.316.420  | 2.727316  |
| 67 | 1 | 3.214.988  | 1.857.567  | 1.663038  |
| 68 | 1 | 1.670.145  | 2.748.351  | 1.685844  |

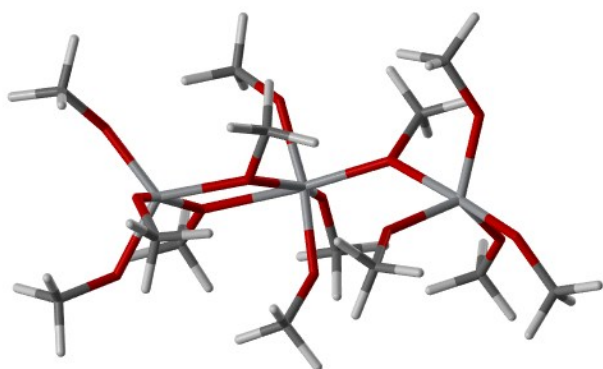

Optimized structure of B'-[Ti<sub>3</sub>(OMe)<sub>13</sub>].
